# Supplementary material
Source: PubMed Central journal article supplement (PMC3730047)
Supplement: neo1508_0966SD1.pdf [file neo1508_0966SD1.pdf]

**Table W1.** Histopathologic Evaluation of Bladders from Untreated and CP31398-Treated Transgenic Mice.

|         | <i>N</i> | Papillary TCC | Normal | Low Grade | High Grade | Noninvasive (CIS) | Invasive |
|---------|----------|---------------|--------|-----------|------------|-------------------|----------|
| Male    |          |               |        |           |            |                   |          |
| Control | 15       | 15            | 0      | 0         | 15         | 0                 | 15       |
| CP 150  | 18       | 18            | 0      | 0         | 18         | 0                 | 18       |
| CP 300  | 17       | 17            | 0      | 0         | 17         | 3                 | 14       |
| Female  |          |               |        |           |            |                   |          |
| Control | 17       | 17            | 0      | 0         | 17         | 0                 | 17       |
| CP 150  | 14       | 14            | 0      | 0         | 14         | 9                 | 5        |
| CP 300  | 14       | 14            | 0      | 0         | 14         | 14                | 0        |

All the transgenic mice showed high-grade, papillary TCC with invasion to muscularis. A significant decrease in invasive TCC was observed in the bladders of CP31398-treated mice.
